# Supplementary material for: Recent meta-analyses neglect previous systematic reviews and meta-analyses about the same topic: a systematic examination
Source: PubMed Central journal article supplement (PMC4411715; doi:10.1186/s12916-015-0317-4), 2015-04-14
Supplement: 12916_2015_317_MOESM6_ESM.pdf [file 12916_2015_317_MOESM6_ESM.pdf]

## Additional file 6

### Detailed characteristics of recent meta-analyses.

|                                       |                                                                                                                                                                                                                                                                                                                                                                |
|---------------------------------------|----------------------------------------------------------------------------------------------------------------------------------------------------------------------------------------------------------------------------------------------------------------------------------------------------------------------------------------------------------------|
| <b>Ahuja</b> <sup>149</sup>           | Topic: multidrug resistant pulmonary tuberculosis treatment<br>People: people with multidrug resistant tuberculosis<br>Intervention: different drug classes<br>Comparison: different drug classes<br>Outcome: treatment success, compared to failure or relapse                                                                                                |
| <b>Bangalore</b> <sup>127</sup>       | Topic: outcomes with various drug eluting or bare metal stents<br>People: patients with diabetes<br>Intervention: drug eluting stents<br>Comparison: drug eluting stents or bare metal stents<br>Outcome: efficacy (target vessel revascularization) and safety (death, myocardial infarction, stent thrombosis)                                               |
| <b>Bellemain-Appaix</b> <sup>23</sup> | Topic: clopidogrel pretreatment<br>People: patients scheduled for percutaneous coronary intervention<br>Intervention: clopidogrel<br>Comparison: placebo, no treatment<br>Outcome: mortality and major bleeding                                                                                                                                                |
| <b>Bischoff-Ferrari</b> <sup>54</sup> | Topic: vitamin D for fracture prevention<br>People: 65 or older<br>Intervention: vitamin D with or without calcium<br>Comparison: placebo or calcium<br>Outcome: hip and nonvertebral fractures                                                                                                                                                                |
| <b>Boekholdt</b> <sup>210</sup>       | Topic: risk of cardiovascular events and statin treatment<br>People: patients treated with statin<br>Intervention: statins<br>Comparison: LDL, non-HDL cholesterol, and apolipoprotein B levels<br>Outcome: risk of major cardiovascular events                                                                                                                |
| <b>Boussageon</b> <sup>241</sup>      | Topic: metformin efficacy in the treatment of type 2 diabetes<br>People: people with type 2 diabetes<br>Intervention: metformin<br>Comparison: diet alone, placebo, no treatment; metformin as an add-on therapy; and metformin withdrawal<br>Outcome: cardiovascular morbidity or mortality                                                                   |
| <b>Caldeira</b> <sup>161</sup>        | Topic: pneumonia associated with use of angiotensin converting enzyme inhibitors and angiotensin receptor blockers<br>People: all<br>Intervention: of angiotensin converting enzyme inhibitors and angiotensin receptor blockers<br>Comparison: control treatment<br>Outcome: incidence of pneumonia and the secondary outcome was pneumonia related mortality |
| <b>Chatterjee</b> <sup>12</sup>       | Topic: beta blockers in patients with heart failure and reduced ejection fraction<br>People: patients with heart failure and reduced ejection fraction<br>Intervention: beta blocker<br>Comparison: another beta blocker, standard treatment or placebo<br>Outcome: all cause death                                                                            |
| <b>EBCTCG</b> <sup>254</sup>          | Topic: polychemotherapy regimens for early breast cancer                                                                                                                                                                                                                                                                                                       |

|                                  |                                                                                                                                                                                                                                                                                                                                                                                                                                                                                     |
|----------------------------------|-------------------------------------------------------------------------------------------------------------------------------------------------------------------------------------------------------------------------------------------------------------------------------------------------------------------------------------------------------------------------------------------------------------------------------------------------------------------------------------|
|                                  | <p>People: women with early breast cancer</p> <p>Intervention: any taxane-plusanthracycline-based regimen or one anthracyclinebased regimen versus another or polychemotherapy</p> <p>Comparison: any taxane-plusanthracycline-based regimen or one anthracyclinebased regimen versus another or polychemotherapy or non-taxane chemotherapy or versus cyclo phosphamide, methotrexate, and fluorouracil or no chemotherapy</p> <p>Outcome: breast cancer mortality rate ratios</p> |
| <b>Fox<sup>47</sup></b>          | <p>Topic: oral anticoagulants for treatment of acute venous thromboembolism</p> <p>People: people with acute venous thromboembolism</p> <p>Intervention: oral anticoagulants (rivaroxaban, dabigatran, ximelagatran, and apixaban)</p> <p>Comparison: other drugs and vitamin K antagonists</p> <p>Outcome: recurrent events, major bleeding, and all-cause mortality</p>                                                                                                           |
| <b>Gómez-Outes<sup>171</sup></b> | <p>Topic: dabigatran, rivaroxaban, apixaban</p> <p>People: people with venous thromboembolism after total hip or knee replacement</p> <p>Intervention: dabigatran, rivaroxaban or apixaban</p> <p>Comparison: enoxaparin</p> <p>Outcome: relative risks of symptomatic venous thromboembolism, clinically relevant bleeding, deaths, and a net clinical endpoint</p>                                                                                                                |
| <b>Haas<sup>64</sup></b>         | <p>Topic: tocolytic therapy for preterm delivery</p> <p>People: women at risk of preterm delivery</p> <p>Intervention: tocolytic agents</p> <p>Comparison: placebo</p> <p>Outcome: 48 hour delay in delivery, respiratory distress syndrome, neonatal mortality and all-cause maternal side effects</p>                                                                                                                                                                             |
| <b>Haase<sup>16</sup></b>        | <p>Topic: hydroxyethyl starch 130/0.38-0.45 versus crystalloid or albumin in patients with sepsis</p> <p>People: patients with sepsis</p> <p>Intervention: hydroxyethyl starch 130/0.38-0.45</p> <p>Comparison: crystalloid or albumin</p> <p>Outcome: mortality, kidney injury, bleeding, and serious adverse events</p>                                                                                                                                                           |
| <b>Harel<sup>6</sup></b>         | <p>Topic: aliskiren and blockers of the renin-angiotensin system in acute kidney injury</p> <p>People: all</p> <p>Intervention: aliskiren and blockers of the renin-angiotensin system</p> <p>Comparison: monotherapy</p> <p>Outcome: hyperkalaemia and acute kidney injury</p>                                                                                                                                                                                                     |
| <b>Hartling<sup>80</sup></b>     | <p>Topic: antipsychotics in adults with schizophrenia</p> <p>People: adults with schizophrenia 18-64yrs</p> <p>Intervention: first- and second-generation antipsychotics</p> <p>Comparison: first- and second-generation antipsychotics</p> <p>Outcome: illness symptoms, diabetes mellitus, mortality, tardive dyskinesia, and a major metabolic syndrome</p>                                                                                                                      |
| <b>Hemmingsen<sup>215</sup></b>  | <p>Topic: metformin and insulin versus insulin alone for type 2 diabetes</p> <p>People: people with type 2 diabetes</p> <p>Intervention: metformin and insulin</p> <p>Comparison: insulin with or without placebo</p> <p>Outcome: all-cause mortality, cardiovascular mortality</p>                                                                                                                                                                                                 |

|                                   |                                                                                                                                                                                                                                                                                                                                                                                                                                                                                                                                                           |
|-----------------------------------|-----------------------------------------------------------------------------------------------------------------------------------------------------------------------------------------------------------------------------------------------------------------------------------------------------------------------------------------------------------------------------------------------------------------------------------------------------------------------------------------------------------------------------------------------------------|
| <b>Hempel</b> <sup>31</sup>       | <p>Topic: probiotics for the prevention and treatment of antibiotic associated diarrhea (AAD)</p> <p>People: people with AAD</p> <p>Intervention: probiotics (Lactobacillus, Bifidobacterium, Saccharomyces, Streptococcus, Enterococcus, and/or Bacillus)</p> <p>Comparison: no treatment, placebo, or a different probiotic</p> <p>Outcome: reduction in AAD</p>                                                                                                                                                                                        |
| <b>Hsu</b> <sup>227</sup>         | <p>Topic: antivirals for treatment of influenza</p> <p>People: people with influenza or influenza-like illness</p> <p>Intervention: oseltamivir, zanamivir, amantadine, or rimantadine</p> <p>Comparison: no therapy or other antiviral therapy, or no comparator</p> <p>Outcome: mortality, hospitalization, duration of symptoms</p>                                                                                                                                                                                                                    |
| <b>Huedo-Medina</b> <sup>42</sup> | <p>Topic: non-benzodiazepine hypnotics in treatment insomnia</p> <p>People: adults with insomnia</p> <p>Intervention: non-benzodiazepine hypnotics</p> <p>Comparison: placebo</p> <p>Outcome: efficacy (change scores, sleep latency)</p>                                                                                                                                                                                                                                                                                                                 |
| <b>Hutton</b> <sup>89</sup>       | <p>Topic: antifibrinolytics in cardiac surgery</p> <p>People: patients undergoing cardiac surgery</p> <p>Intervention: antifibrinolytics</p> <p>Comparison: no treatment</p> <p>Outcome: risks of death, myocardial infarction, stroke, and renal failure or dysfunction</p>                                                                                                                                                                                                                                                                              |
| <b>Jackson</b> <sup>212</sup>     | <p>Topic: botulinum toxin, migraine and tension headaches</p> <p>People: adults with headaches (episodic or chronic) or migraines</p> <p>Intervention: botulinum toxin A</p> <p>Comparison: placebo or other intervention</p> <p>Outcome: incidence of headaches</p>                                                                                                                                                                                                                                                                                      |
| <b>Jardine</b> <sup>177</sup>     | <p>Topic: folic acid based homocysteine lowering and cardiovascular</p> <p>People: people with chronic kidney disease or transplant, without dialysis</p> <p>Intervention: folic acid based homocysteine</p> <p>Comparison: placebo or usual care or lower vs. higher dose</p> <p>Outcome: cardiovascular events (myocardial infarction, stroke, and cardiovascular mortality, access thrombosis, requirement for renal replacement therapy) and reported adverse events, including haematological and neurological events</p>                            |
| <b>Johnston</b> <sup>28</sup>     | <p>Topic: probiotics for the prevention of clostridium difficile-associated diarrhea (CDAD)</p> <p>People: adult or pediatric patients receiving antibiotics</p> <p>Intervention: probiotics for prevention</p> <p>Comparison: placebo or no treatment</p> <p>Outcome: incidence of CDAD</p>                                                                                                                                                                                                                                                              |
| <b>Karagiannis</b> <sup>155</sup> | <p>Topic: dipeptidyl peptidase-4 inhibitors for treatment of diabetes</p> <p>People: adults with type 2 diabetes mellitus</p> <p>Intervention: dipeptidyl peptidase-4 (DPP-4)</p> <p>Comparison: metformin as monotherapy or other commonly used hypoglycaemic drugs combined with metformin</p> <p>Outcome: change in baseline in glycated haemoglobin, body weight, discontinuation rate because of any adverse event, occurrence of any serious adverse event, all-cause mortality, and incidence of hypoglycaemia, nasopharyngitis, urinary tract</p> |

|                                  |                                                               |                                                                                                                                                                                                                                                                                                                            |
|----------------------------------|---------------------------------------------------------------|----------------------------------------------------------------------------------------------------------------------------------------------------------------------------------------------------------------------------------------------------------------------------------------------------------------------------|
|                                  |                                                               | infection, upper respiratory infection, nausea, vomiting, and diarrhea                                                                                                                                                                                                                                                     |
| <b>Ker</b> <sup>184</sup>        | Topic:<br>People:<br>Intervention:<br>Comparison:<br>Outcome: | tranexamic acid and surgical bleeding<br>surgical patients<br>tranexamic acid<br>no tranexamic acid or placebo<br>blood transfusion, thromboembolic events                                                                                                                                                                 |
| <b>Leucht</b> <sup>182</sup>     | Topic:<br>People:<br>Intervention:<br>Comparison:<br>Outcome: | Antipsychotic drugs for relapse prevention in schizophrenia<br>people with schizophrenia<br>antipsychotic drugs<br>placebo<br>relapse prevention                                                                                                                                                                           |
| <b>Lopez-Olivo</b> <sup>94</sup> | Topic:<br>People:<br>Intervention:<br>Comparison:<br>Outcome: | malignancies in patients with rheumatoid arthritis<br>patients with rheumatoid arthritis<br>biologic response modifiers<br>other disease-modifying antirheumatic drugs or with placebo<br>risk of malignancies                                                                                                             |
| <b>Low</b> <sup>49</sup>         | Topic:<br>People:<br>Intervention:<br>Comparison:<br>Outcome: | acetazolamide for the prophylaxis of acute mountain sickness<br>all<br>acetazolamide for prevention<br>placebo<br>event rates                                                                                                                                                                                              |
| <b>Lv</b> <sup>152</sup>         | Topic:<br>People:<br>Intervention:<br>Comparison:<br>Outcome: | intensive blood pressure (BP) lowering<br>all<br>intensive BP lowering regimens<br>standard regimens<br>vascular eye and renal outcomes                                                                                                                                                                                    |
| <b>MacArthur</b> <sup>76</sup>   | Topic:<br>People:<br>Intervention:<br>Comparison:<br>Outcome: | opiate substitution treatment and HIV<br>people who inject drugs<br>opiate substitution treatment<br>no treatment or methadone<br>incidence of HIV                                                                                                                                                                         |
| <b>Makani</b> <sup>1</sup>       | Topic:<br>People:<br>Intervention:<br>Comparison:<br>Outcome: | dual blockade of the renin-angiotensin system<br>humans<br>dual blockade<br>monotherapy<br>long term efficacy (all-cause mortality, cardiovascular mortality, and admissions to hospital for heart failure), safety events (hyperkalemia, hypotension, renal failure, and withdrawal owing to drug related adverse events) |
| <b>Mantha</b> <sup>136</sup>     | Topic:<br>People:<br>Intervention:<br>Comparison:<br>Outcome: | risk of venous thromboembolic events<br>women taking progestin-only contraception<br>progestin-only contraception<br>non-hormone comparator group<br>risk of venous thromboembolic events                                                                                                                                  |
| <b>McKnight</b> <sup>247</sup>   | Topic:<br>People:<br>Intervention:<br>Comparison:<br>Outcome: | lithium toxicity profile<br>people with bipolar or mood disorders<br>lithium<br>placebo, no treatment or other drugs<br>adverse events                                                                                                                                                                                     |

|                                 |                                                                                                                                                                                                                                                                                                                                                                                                                                                                                       |
|---------------------------------|---------------------------------------------------------------------------------------------------------------------------------------------------------------------------------------------------------------------------------------------------------------------------------------------------------------------------------------------------------------------------------------------------------------------------------------------------------------------------------------|
| <b>Mihaylova</b> <sup>124</sup> | <p>Topic: lowering LDL cholesterol with statin therapy</p> <p>People: people at low risk of vascular disease</p> <p>Intervention: statins</p> <p>Comparison: control treatment or placebo</p> <p>Outcome: coronary vascular stroke cancer mortality</p>                                                                                                                                                                                                                               |
| <b>Neumann</b> <sup>209</sup>   | <p>Topic: oral direct factor xa inhibitors vs. low-molecular-weight heparin</p> <p>People: patients undergoing total hip or knee replacement</p> <p>Intervention: oral direct factor Xa inhibitor</p> <p>Comparison: low-molecular-weight heparin</p> <p>Outcome: mortality at the end of prophylaxis, mortality during the follow-up period, symptomatic DVT, nonfatal pulmonary embolism, major bleeding (as defined by the investigators on each trial), intracranial bleeding</p> |
| <b>Palmer</b> <sup>118</sup>    | <p>Topic: statin therapy for persons with chronic kidney disease</p> <p>People: adults with chronic kidney disease</p> <p>Intervention: statins</p> <p>Comparison: placebo, no treatment, or another statin</p> <p>Outcome: mortality and cardiovascular outcomes</p>                                                                                                                                                                                                                 |
| <b>Palmer</b> <sup>246</sup>    | <p>Topic: antiplatelet therapy in chronic kidney disease</p> <p>People: people with chronic kidney disease</p> <p>Intervention: antiplatelet therapy</p> <p>Comparison: standard care, placebo, or no treatment</p> <p>Outcome: mortality and cardiovascular and bleeding outcomes</p>                                                                                                                                                                                                |
| <b>Palmerini</b> <sup>216</sup> | <p>Topic: stent thrombosis with drug-eluting and bare-metal stents</p> <p>People: all</p> <p>Intervention: drug-eluting stents</p> <p>Comparison: drug eluting stents or bare-metal stents</p> <p>Outcome: risk of thrombosis</p>                                                                                                                                                                                                                                                     |
| <b>Pinto</b> <sup>39</sup>      | <p>Topic: epidural corticosteroid injections in the management of sciatica</p> <p>People: people with sciatica</p> <p>Intervention: epidural corticosteroid injection</p> <p>Comparison: placebo</p> <p>Outcome: pain reduction</p>                                                                                                                                                                                                                                                   |
| <b>Pinto</b> <sup>250</sup>     | <p>Topic: drugs for relief of pain in sciatica</p> <p>People: patients with sciatica</p> <p>Intervention: single, combination or adjuvant: non-steroidal anti-inflammatory drugs (NSAIDs), corticosteroids, antidepressants, anticonvulsants, muscle relaxants, and opioid analgesics</p> <p>Comparison: placebo or other treatment</p> <p>Outcome: pain intensity, disability status, work status, and adverse events</p>                                                            |
| <b>Plante</b> <sup>113</sup>    | <p>Topic: effect of systemic steroids on post-tonsillectomy</p> <p>People: patients undergoing tonsillectomy</p> <p>Intervention: systemic steroids</p> <p>Comparison: any other drug</p> <p>Outcome: risk of postoperative bleeding and reintervention</p>                                                                                                                                                                                                                           |
| <b>Preiss</b> <sup>116</sup>    | <p>Topic: lipid-modifying therapies and risk of pancreatitis</p> <p>People: adult patients</p> <p>Intervention: statin or fibrate therapy</p>                                                                                                                                                                                                                                                                                                                                         |

|                                |               |                                                                                                                                  |
|--------------------------------|---------------|----------------------------------------------------------------------------------------------------------------------------------|
|                                | Comparison:   | placebo or treatment as usual                                                                                                    |
|                                | Outcome:      | incidents of pancreatitis                                                                                                        |
| <b>Rahimi</b> <sup>109</sup>   | Topic:        | statins and venous thromboembolic events                                                                                         |
|                                | People:       | all                                                                                                                              |
|                                | Intervention: | statin or high dose                                                                                                              |
|                                | Comparison:   | no statin or standard dose                                                                                                       |
|                                | Outcome:      | risk of venous thromboembolic events                                                                                             |
| <b>Rutjes</b> <sup>138</sup>   | Topic:        | viscosupplementation for osteoarthritis of the knee                                                                              |
|                                | People:       | adults with symptomatic knee osteoarthritis                                                                                      |
|                                | Intervention: | viscosupplementation                                                                                                             |
|                                | Comparison:   | sham or nonintervention control                                                                                                  |
|                                | Outcome:      | pain intensity and flare-ups adverse events                                                                                      |
| <b>Silvain</b> <sup>258</sup>  | Topic:        | enoxaparin versus unfractionated heparin during percutaneous coronary intervention                                               |
|                                | People:       | patients having percutaneous coronary intervention                                                                               |
|                                | Intervention: | enoxaparin                                                                                                                       |
|                                | Comparison:   | unfractionated heparin                                                                                                           |
|                                | Outcome:      | mortality and major bleeding                                                                                                     |
| <b>Stafford</b> <sup>9</sup>   | Topic:        | early interventions to prevent psychosis                                                                                         |
|                                | People:       | people at high risk of psychosis                                                                                                 |
|                                | Intervention: | any psychological, pharmacological, nutritional or combined                                                                      |
|                                | Comparison:   | usual services or another treatment                                                                                              |
|                                | Outcome:      | transition to psychosis, symptoms of psychosis, depression, and mania; quality of life; weight; and discontinuation of treatment |
| <b>Suthar</b> <sup>165</sup>   | Topic:        | antiretroviral therapy for prevention of tuberculosis                                                                            |
|                                | People:       | adults with HIV                                                                                                                  |
|                                | Intervention: | antiretroviral therapy                                                                                                           |
|                                | Comparison:   | no antiretroviral drug                                                                                                           |
|                                | Outcome:      | incidence of tuberculosis                                                                                                        |
| <b>Upadhyay</b> <sup>123</sup> | Topic:        | lipid-lowering therapy                                                                                                           |
|                                | People:       | persons with chronic kidney disease                                                                                              |
|                                | Intervention: | lipid-lowering therapy                                                                                                           |
|                                | Comparison:   | control treatment or placebo                                                                                                     |
|                                | Outcome:      | cardiovascular and kidney outcomes, and adverse events                                                                           |
| <b>Varadhan</b> <sup>221</sup> | Topic:        | antibiotics compared with appendectomy for treatment of uncomplicated acute appendicitis                                         |
|                                | People:       | people with uncomplicated acute appendicitis                                                                                     |
|                                | Intervention: | antibiotics                                                                                                                      |
|                                | Comparison:   | appendectomy                                                                                                                     |
|                                | Outcome:      | complications, efficacy of treatment, length of stay, and incidence of complicated appendicitis and readmissions                 |
| <b>Vilsboll</b> <sup>262</sup> | Topic:        | glucagon-like peptide-1 receptor agonists and weight loss                                                                        |
|                                | People:       | overweight or obese patients (body mass index of 25 or higher) with or without type 2 diabetes mellitus.                         |
|                                | Intervention: | glucagon-like peptide-1 receptor agonists (exenatide, liraglutide)                                                               |
|                                | Comparison:   | placebo, oral antidiabetic drugs, or insulin                                                                                     |
|                                | Outcome:      | weight loss                                                                                                                      |
| <b>Wardlaw</b> <sup>167</sup>  | Topic:        | recombinant tissue plasminogen activator (rt-PA)                                                                                 |
|                                | People:       | people within 6 h of onset of acute ischaemic stroke                                                                             |

Intervention: intravenous rt-PA  
Comparison: control  
Outcome: odds of being alive, benefit

**Zarychanski<sup>52</sup>**

Topic: hydroxyethyl starch in critically ill requiring volume resuscitation  
People: critically ill  
Intervention: hydroxyethyl starch  
Comparison: crystalloids, albumin, or gelatin  
Outcome: mortality and acute kidney injury
